# Supplementary material for: Effects of Aneuploidy on Genome Structure, Expression, and Interphase Organization in Arabidopsis thaliana
Source: PLOS journal article supplement (doi:10.1371/journal.pgen.1000226), 2008-10-16
Supplement: S5 (10.1371/journal.pgen.1000226.s005) [file journal.pgen.1000226.s005]

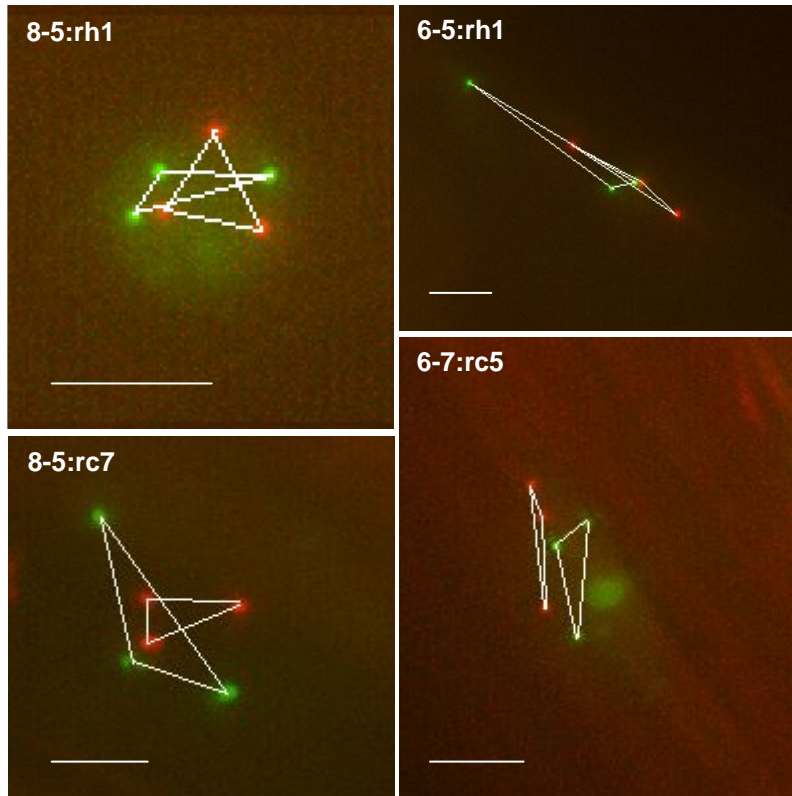

**Figure S5. Huettel et al.**

**Examples of connected YFP and DsRed dots for measurements of inter-allelic distances and reconstructions in three-dimensions (Table S2).**

The photographs show maximum projections (all stacks collapsed into one plane). The bar indicates 5  $\mu\text{m}$ . The labelling denotes the plant tested. Triploids (8-5) are on the left; trisomics (6-5, 6-7) on the right.
